# Supplementary material for: Bone marrow transplantation increases sulfatase activity in somatic tissues in a multiple sulfatase deficiency mouse model
Source: PubMed Central journal article supplement — Commun Med (Lond). 2024 Oct 25;4:215. doi: 10.1038/s43856-024-00648-y (PMC11502872; doi:10.1038/s43856-024-00648-y), 2024-10-25
Supplement: 43856_2024_648_MOESM1_ESM.pdf [file 43856_2024_648_MOESM1_ESM.pdf]

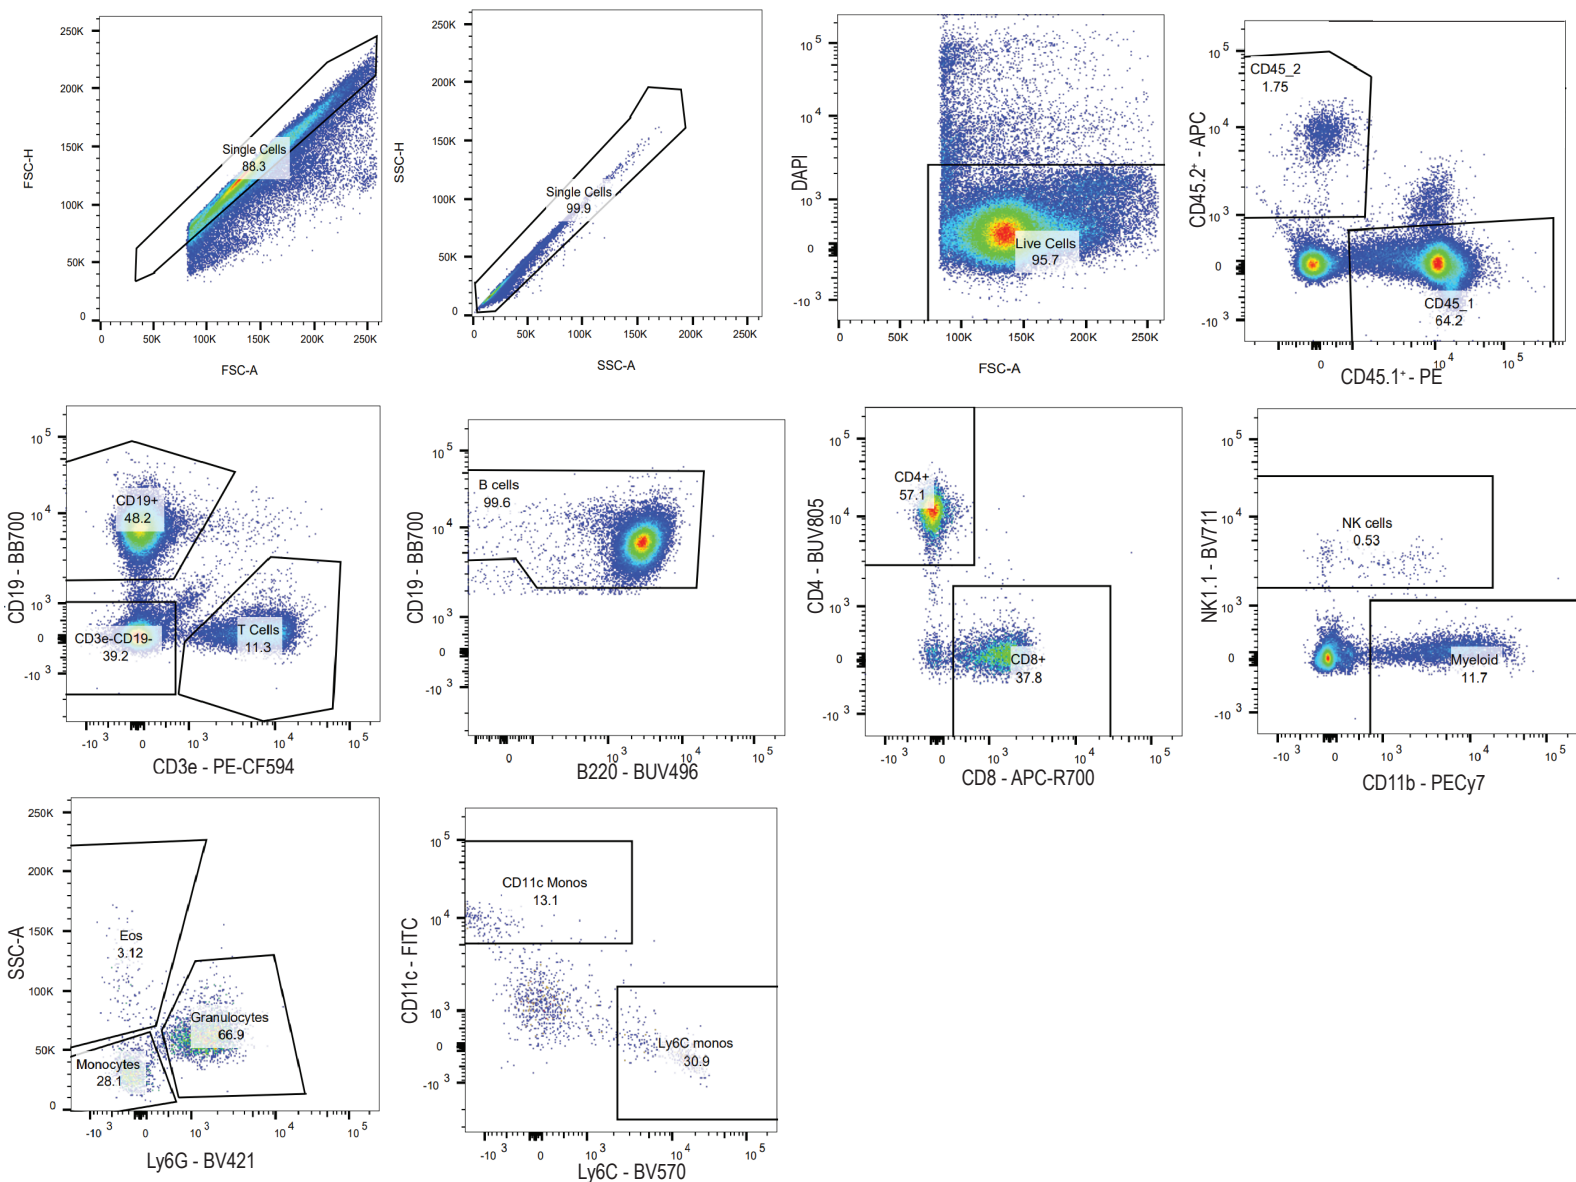

**Supplementary Figure 1a: Flow cytometry gating strategy for spleen analysis**

Representative gating strategy for B-cells, T-cells, T-CD4 and T-CD8 as measured by flow cytometry. First, doublet discrimination is performed with a double gate (FSC-H/FSC-A and SSC-H/SSC-A). Only viable cells are evaluated, identified by low DAPI and FSC-A.

From the live cells population gate, the two CD45<sup>+</sup> population (resident and transplanted cells) are identified with CD45.2<sup>+</sup>/CD45.1<sup>+</sup>. Total T-Cells population was defined as CD19<sup>-</sup>CD3e<sup>+</sup>. The B-Cells are identified through the CD19/B220 from CD19<sup>+</sup> cells. While CD4<sup>+</sup> and CD8<sup>+</sup> population are gated from T-cells population using CD4/CD8.

To analyze the eosinophil (Eos), monocytes and the granulocytes populations, the gate strategy to select the myeloid cells is applied using NK1.1/CD11b from CD3e-CD19<sup>-</sup>. Finally the CD11c monocytes are gated from the myeloid population.

**Supplementary Table 1: Antibodies used for flow cytometry analysis.**

| Fluorochrome | Marker | Catalog#     | Company        | Clone    |
|--------------|--------|--------------|----------------|----------|
| FITC         | CD11c  | 35-0114-U100 | Tonbo          | N418     |
| BB700        | CD19   | 566411       | BD Biosciences | 1D3      |
| PE           | CD45.1 | 110708       | BioLegend      | A201.7   |
| PE-CF594     | CD3e   | 562286       | BD Biosciences | 145-2C11 |
| PC7          | CD11b  | 552850       | BD Biosciences | M1/70    |
| APC          | CD45.2 | 20-0454-u100 | Tonbo          | 1042.1   |
| APC-R700     | CD8    | 564983       | BD Biosciences | 53-6.72  |
| BV421        | Ly6G   | 562737       | BD Biosciences | 1A8      |
| BV570        | Ly6C   | 128029       | BioLegend      | HK1.4    |
| BV711        | NK1.1  | 108745       | BioLegend      | PK136    |
| BUV496       | B220   | 612950       | BD Biosciences | RA3-6B2  |
| BUV805       | CD4    | 564922       | BD Biosciences | GK1.5    |
| DAPI         | N/A    | N/A          | N/A            | N/A      |

**(a)**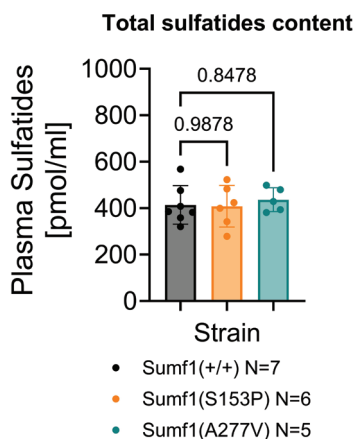**(b)**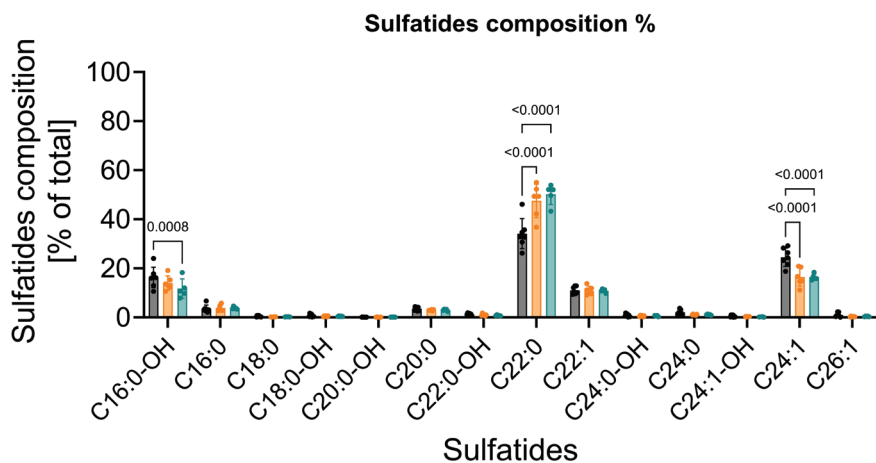**(c)**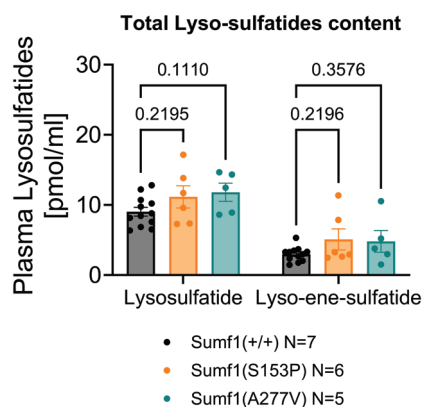**(d)**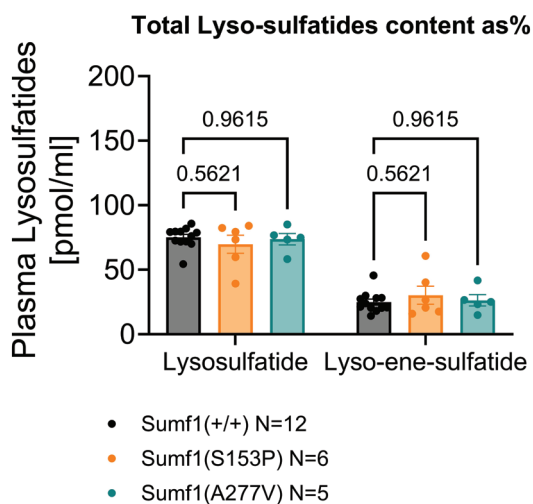

### Supplementary Figure 2: Sulfatides and Lyso-sulfatides content in Sumf1 mutant mice.

Sulfatides and Lyso-sulfatides were assessed in plasma samples of Sumf1(S153P) and Sumf1(A277V) homozygous mice at 6 months of age. **a** Total sulfatide content. **b** Composition of different sulfatides species as percentage of total. **c** Lyso-sulfatides content represented as concentration or **d** percentage of total. Bar graphs represent the mean  $\pm$  SD, N = 5-12, mixed sex. Statistical significance was assessed by two-way ANOVA and Dunnet's multiple comparison test. Absolute p-values are indicated.

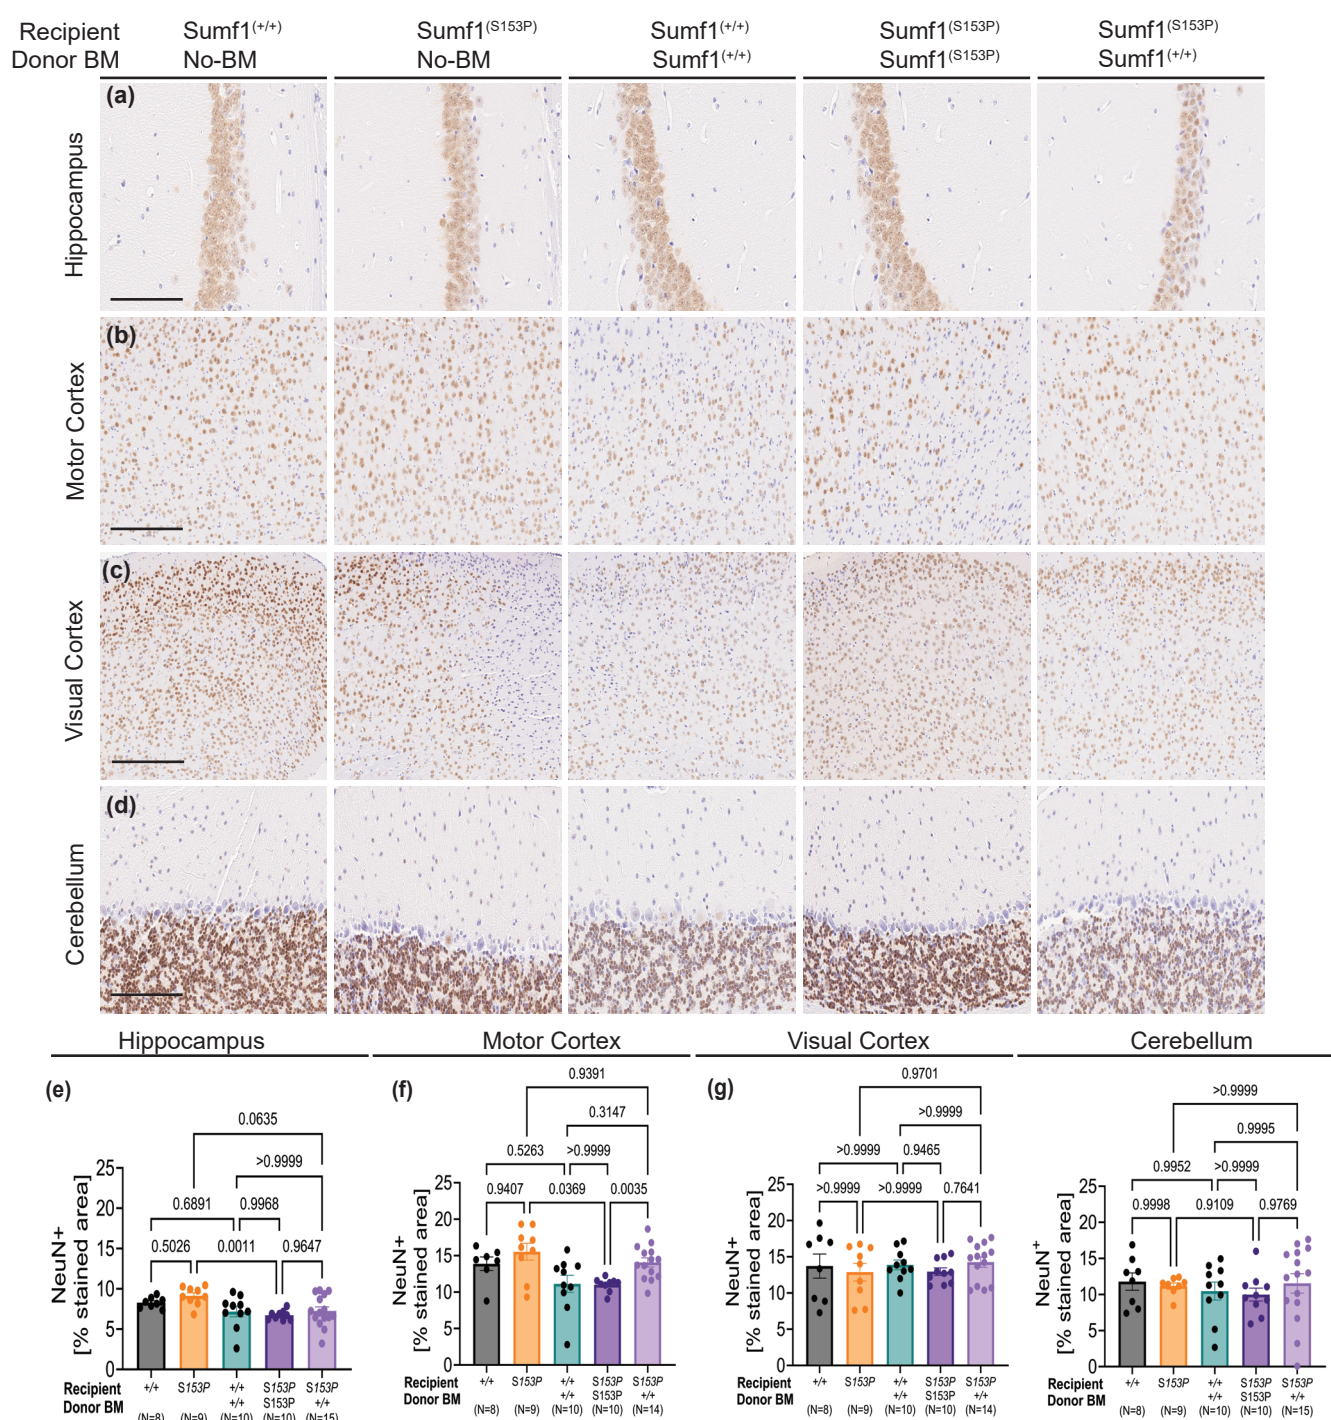

### Supplementary Figure 3: Neurodegeneration analysis

NeuN<sup>+</sup> immunohistochemistry on brain of Sumf1<sup>+/+</sup>, and Sumf1<sup>S153/S153P</sup>, without bone marrow (BM) transplant or receiving either Sumf1<sup>+/+</sup> BM or Sumf1<sup>S153/S153P</sup> BM. Representative images of **a** hippocampus, **b** motor cortex, **c** visual cortex, **d** cerebellum. Representation of % Stained Area of NeuN<sup>+</sup> in **e** Hippocampus (CA1), **f** Motor Cortex, **g** Visual Cortex, and **h** Cerebellum shown as mean ± SEM. Images from hippocampus and cortex at magnification X20, scale bar 50 μm. Scale bar for cerebellum: X40, 25 μm. Multiple comparisons using Brown-Forsythe and Welch ANOVA tests. Absolute p-values are indicated.



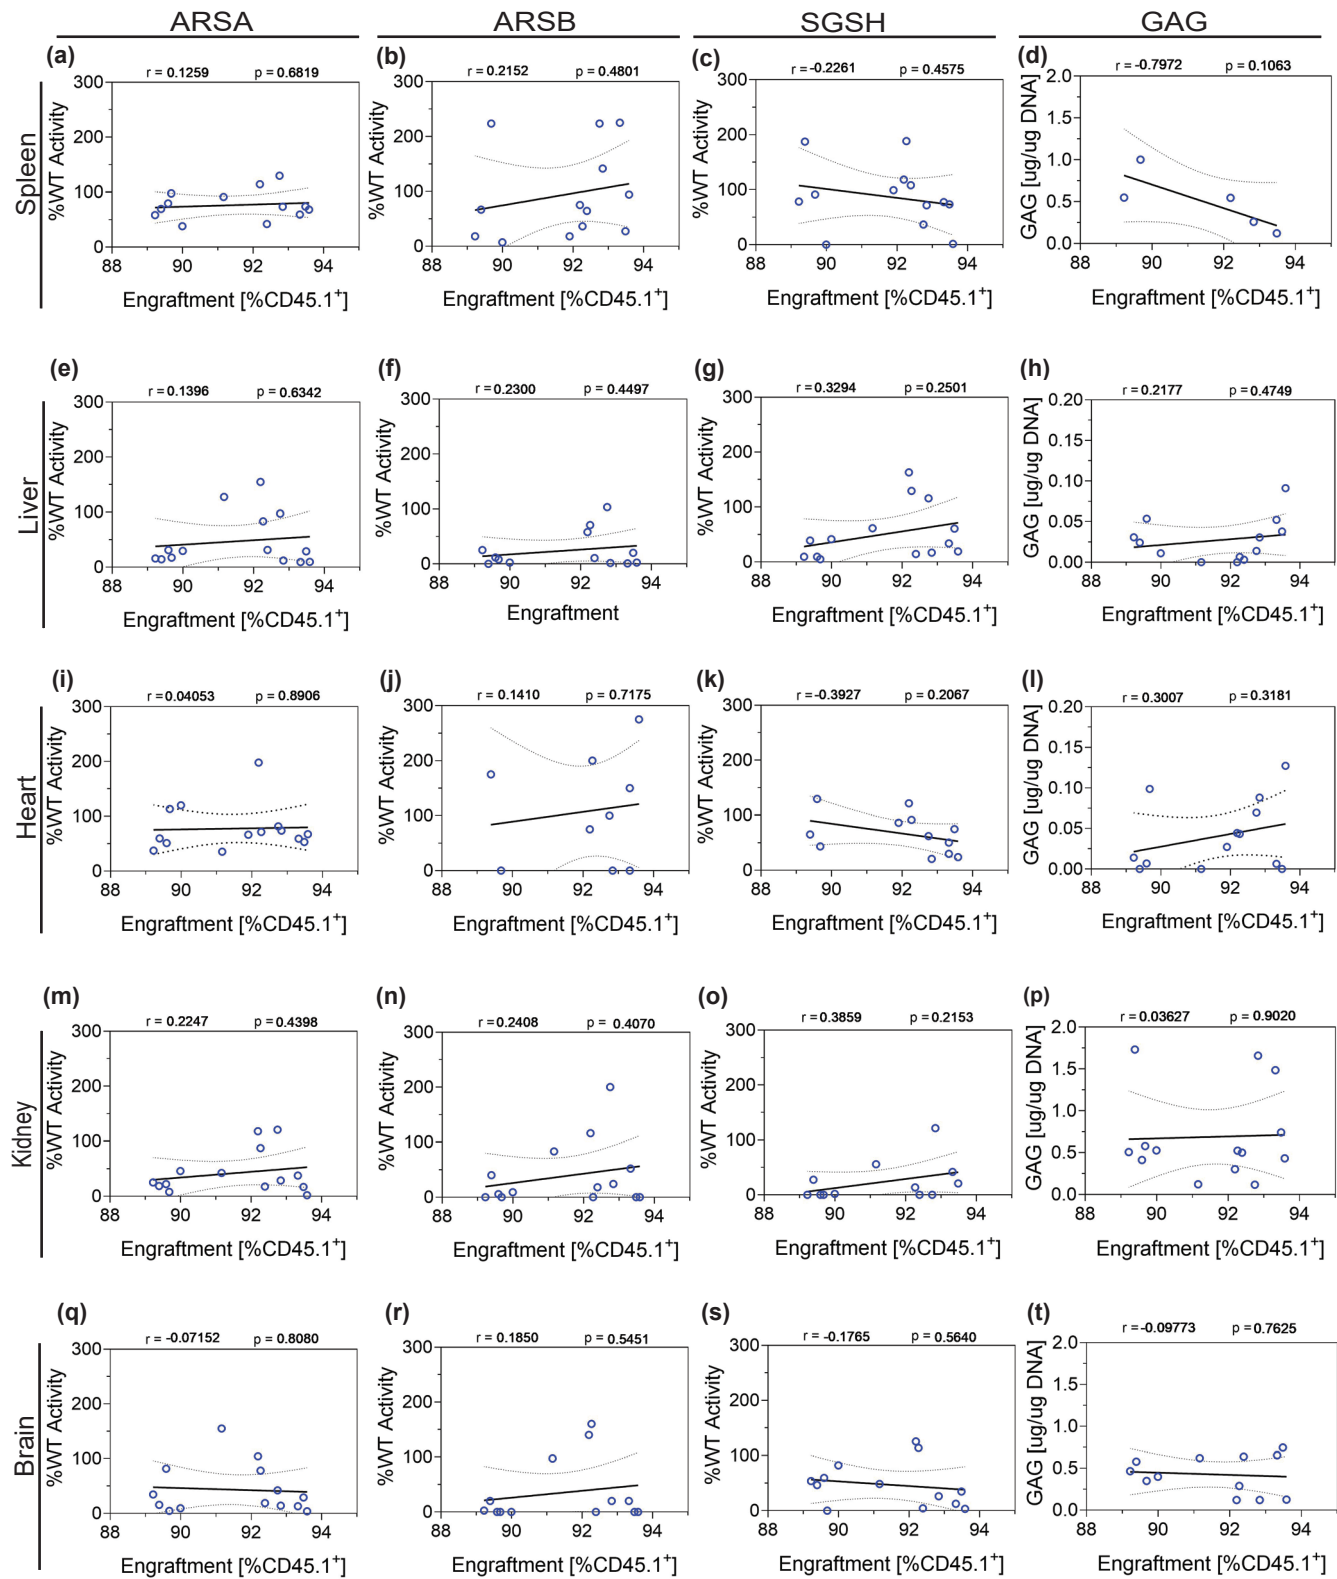

**Supplemental Figure 5: Correlation Sulfatase activity, and GAG content vs Engraftment frequency**  
 The frequency of donor derived CD45.1<sup>+</sup> cells in peripheral blood leukocytes, is graphed vs the sulfatase activity for ARSA, ARSB, SGSH, and total GAG. Sulfatase activity is represented as percentage of WT controls. Total GAG tissue content is represented as ug normalized to gDNA content. **a-d** Spleen, **e-h** Liver, **i-l** Heart, **m-p** Kidney, **q-t** Brain. For each pair comparison, the Pearson correlation coefficient (r) and the p-value (p) is reported. Each graph include a linear regression model.
