# Supplementary material for: Bone marrow transplantation increases sulfatase activity in somatic tissues in a multiple sulfatase deficiency mouse model
Source: PubMed Central journal article supplement — Commun Med (Lond). 2024 Oct 25;4:215. doi: 10.1038/s43856-024-00648-y (PMC11502872; doi:10.1038/s43856-024-00648-y), 2024-10-25
Supplement: 43856_2024_648_MOESM2_ESM.pdf [file 43856_2024_648_MOESM2_ESM.pdf]

## Description of Additional Supplementary Files

**File name:** Supplementary Data 1

**File description:** Exact P values.
